# **Dominant coral bacterium *Endozoicomonas acroporae* metabolizes Dimethylsulfoniopropionate**

**Kshitij Tandon<sup>1,2,3</sup>, Pei-Wen Chiang<sup>1</sup>, Chih-Ying Lu<sup>1</sup>, Shan-Hua Yang<sup>4,5</sup>, Ya-Fan Chan<sup>1</sup>, Naohisa Wada<sup>1</sup>, Ping-Yun Chen<sup>6</sup>, Hsiao-Yu Chang<sup>6</sup>, Ming-Shean Chou<sup>6</sup>, Wen-Ming Chen<sup>7</sup>, Sen-Lin Tang<sup>1,2</sup>**  
#

<sup>1</sup>Biodiversity Research Center, Academia Sinica, Taipei 115, Taiwan

<sup>2</sup>Bioinformatics Program, Institute of Information Science, Taiwan International Graduate Program, Academia Sinica, Taipei 115, Taiwan

<sup>3</sup>Institute of Bioinformatics and Structural Biology, National Tsing Hua University, Hsinchu 300, Taiwan

<sup>4</sup>Department of Life Science, Tunghai University, Taichung 40704, Taiwan

<sup>5</sup>Center for Ecology and Environment, Tunghai University, Taichung 40704, Taiwan

<sup>6</sup>Institute of Environmental Engineering, National Sun Yat-sen University, Kaohsiung 80424 Taiwan, ROC

<sup>7</sup>Laboratory of Microbiology, Department of Seafood Science, National Kaohsiung Marine University, No. 142, Hai-Chuan Rd, Nan-Tzu, Kaohsiung City 811, Taiwan, ROC.

# Corresponding author

Corresponding author Email: [sltang@gate.sinica.edu.tw](mailto:sltang@gate.sinica.edu.tw)

## Abstract

Dominant coral-associated *Endozoicomonas* bacteria species are hypothesized to play a role in the global sulfur cycle by metabolizing Dimethylsulfoniopropionate (DMSP) into Dimethylsulfide (DMS); a climate active-gas, which releases sulfur into the atmosphere; however, no sequenced genome to date harbors genes for this process. We assembled high-quality (>95% complete) genomes of two new strains (Acr-1 and Acr-5) of a recently added species *Endozoicomonas acroporae* isolated from the coral *Acropora muricata*. We identified the first DMSP lyase—a *dddD* gene homolog found in all *E. acroporae*, and functionally characterized bacteria being capable of metabolizing DMSP into DMS via the DddD cleavage pathway using RT-qPCR and Gas chromatography (GC). This study confirms the role of *Endozoicomonas* in the global sulfur cycle.

## Introduction

The genus *Acropora* contains some of the most abundant reef-building corals in the Indo-Pacific [1], and these corals are also some of the most significant producers of dimethylsulphonioacetate (DMSP) [2, 3]. DMSP is present in coral tissue, mucus and endosymbiont dinoflagellates (Symbiodiniaceae) [4, 5]. It is the central molecule in the marine sulfur cycle and precursor to dimethylsulphide (DMS), a climate-active gas [6, 7]. DMSP is hypothesized to be part of the coral holobiont antioxidant system [8] and it act as an osmoprotectant against salinity fluctuations [3]. DMSP also acts as a signal molecule that attracts specific bacterial groups, which can form coral holobionts and underpin coral health [9].

Coral-associated bacteria use DMSP produced by corals and their symbiotic algae as a reduced sulfur and carbon source [9, 10]; they can also metabolize it into DMS [6, 7]. DMSP degradation by marine organisms takes place via two pathways, the cleavage pathway and the demethylation pathway [10, 11]. A recent study reported that the majority of DMSP-degrading bacteria belong to class *Gammaproteobacteria*, which includes *Alteromonas*-, *Arhodomonas*-, *Idiomarina*-, *Pseudomonas*- and *Spongiobacter*-related organisms [12]. Of these, *Arhodomonas*-, *Pseudomonas*-, and *Roseobacter*-related species harbor a DMSP lyase—i.e. the *dddD* gene, first identified in *Marinomonas* sp. for degrading DMSP [13]. *Endozoicomonas* species, which are predominantly associated with keeping their coral host healthy [14], have been hypothesized to play role in the global sulfur cycle by effectively metabolizing DMSP into DMS [15, 16]. However, no previous study has confirmed the genus' role. Here, we provide the conclusive evidence that one of *Endozoicomonas* species metabolize DMSP into DMS.

59

## 60 **Material and Methods**

61       We *de-novo* assembled high quality (>95% complete) genomes of two new strains (Acr-1  
62 and Acr-5) of a recently added species *Endozoicomonas acroporae* isolated from the coral  
63 *Acropora muricata* and identified for the first time a *dddD* gene homolog capable of  
64 metabolizing DMSP into DMS via the *DddD* cleavage pathway in all the *E. acroporae* strains.  
65 Furthermore, we functionally characterized the expression of the *dddD* gene and quantified the  
66 amount of DMS released using RT-qPCR and Gas chromatography (GC). Comparative genomic  
67 analysis of genus *Endozoicomonas* was performed to ascertain its genomic characteristics and  
68 features. We also profiled the abundance of *E. acroporae* species from two previous studies on  
69 different species of corals in Penghu, Taiwan [17] and the Red Sea, Saudi Arabia [18] (for details  
70 see supplementary data: material and methods).

71

## 72 **Results and Discussion**

73       *E. acroporae* species are dominant coral-associated bacteria in the Red Sea, Saudi Arabia  
74 (Fig S2A, B) and Penghu, Taiwan (Fig S2C, D), depicting their wide distribution among different  
75 coral species. When comparing *E. acroporae* Acr-1, Acr-5 with previously assembled type strain  
76 *E. acroporae* Acr-14<sup>T</sup> [19, 20] (supplementary results Table S1, Fig S1), all three strains of *E.*  
77 *acroporae* have a *dddD* gene homolog that encodes a DMSP lyase. RT-qPCR analysis of the *dddD*  
78 gene from *E. acroporae* Acr-14<sup>T</sup> cultured in 1 mM DMSP resulted in 42.77, 56.52, and 91.37

times higher expression than samples cultured without DMSP after 16, 24 and 48hrs, respectively (Fig 1A). The amount of DMS released when the culture (*E. acroporae* Acr-14<sup>T</sup>) was incubated in a DMSP-rich environment was significantly higher (t-test, p-value <0.05) than controls (Fig 1B). The temporal increase in the concentration of released DMS confirms that *E. acroporae* can metabolize DMSP into DMS. The discovery of the *dddD* gene in *Endozoicomonas* provides new insights into the evolution of the DMSP cleavage pathway and further confirms the hypothesis that *Endozoicomonas* plays a role in the global sulfur cycle.

Comparative genomic analysis identified that only *E. acroporae* have the DMSP metabolism gene(s) so far (Table S2). Further, we report high genomic divergence using Amino-Acid Identity (AAI), Average Nucleotide Identity (ANI) and DNA-DNA Hybridization (DDH) (Fig 2A, B, and C) in the genus and also a reduced core genome (308 genes) (supplementary data: results, Fig S5). Genomes of *Endozoicomonas* species are large (5.43 ~ 6.69 Mb) (Table S2) and encode genes for all essential amino-acids [21], giving clues about not predominant genome streamlining as identified in symbiotic bacteria [22] and other symbiotic life stages [21]. Moreover, *E. acroporae* species have the highest number of T3SS genes in *Endozoicomonas* (supplementary data: results, Table S3), suggesting an intricate relationship with their host. Besides, *E. acroporae* strains have different Insertion Sequence (IS) elements than *E. montiporae*, hinting that the two coral-isolates have different evolution histories [23] (supplementary data: results, Fig S3). Furthermore, diverse phage insertions in *Endozoicomonas* species genomes suggest different infection histories (supplementary data: results, Table S4). In addition, *E. montiporae* and *E. acroporae* do not share any branches, according to core-genome based phylogenetic analysis; instead, their strains cluster tightly within their clades (Fig 2D).

These results indicate that host and *Endozoicomonas* species have a complex nature of co-diversification. All species in this genus have a high percentage of oxidative stress responsive genes, which might be attributed to resistance against low oxygen environment in the ocean as well as highlight the genus *Endozoicomonas*' adaptation to marine environments (supplementary data: results, Fig S4).

## Conclusion

*Endozoicomonas* is the most dominant coral-associated bacterial group. Here, we link their function in the global element cycle. In addition, comparative genomic analysis of the genus *Endozoicomonas* gives clues about high genomic divergence and genome plasticity. Although, current understanding of the interaction among coral-microbe-sulfur cycle is still not clear, the results from this study will be beneficial for investigating the global change in the reef ecosystem functioning with the changing environment.

## Data Availability

*E. acroporae* Acr-1 and Acr-5 assembled draft genomes are submitted to GenBank under accession numbers SAUT000000000 and SAUU000000000, respectively.

## Acknowledgements

This study was supported by funding from Academia Sinica. KT would like to acknowledge the Taiwan International Graduate Program (TIGP) for its fellowship towards his graduate studies. Authors would like to acknowledge support from Dr. Shu-Fen Chiou for GC experiment.

## Author Contributions

K.T and S.L.T conceived the idea of this study. K.T assembled the genomes, performed bioinformatics analysis and wrote the manuscript. P.W.C cultured the strains and performed RT-qPCR analysis. C.Y.L and Y.F.C performed GC experiments and analysis. S.H.Y and N.W helped write the manuscript. P.Y.C, H.Y.C, and M.S.C helped in GC experiments and provided the instruments for conducting the experiment. W.M.C provided the cultures. S.L.T supervised the overall study and modified the manuscript. All authors read and approved the manuscript.

## Conflict of Interest

The authors declare that they have no conflict of interest.

## References

1. Veron, JEN. *Corals of the World* Vol. 1-3 (Australian Institute of Marine Science, 2000).
2. Broadent AD, Jones GB, and Jones RJ. DMSP in Corals and Benthic Algae from the Great Barrier Reef. *Estuar. Coast. Shelf Sci.* 2002;55:547-555.
3. Raina JB, Tapiolas DM, Foret S, Lutz A, Abrego D, Ceh J *et al.* DMSP biosynthesis by an animal and its role in coral thermal stress response. *Nature.* 2013; 502:677-680.
4. Broadent AD and Jones GB. DMS and DMSP in mucus ropes, coral mucus, surface films and sediment pore waters from coral reefs in the Great Barrier Reef. *Mar Freshwater Res.* 2004;55:849-855.

5. LaJeunesse TC, Parkinson JE, Gabrielson PW, Jeong HJ, Reimer JD, Voolstra CR, et al. Systematic revision of symbiodiniaceae highlights the antiquity and diversity of coral endosymbionts. *Curr Bio.* 2018;28:2570-80.
6. Ayers GP and Gras, JL. Seasonal relationship between cloud condensation nuclei and aerosol methanesulphonate in marine air. *Nature.* 1991;353:834-835.
7. Vallina SM and Simo R. Strong relationship between DMSP and the solar radiation dose over the global surface ocean. *Science.* 2007;315:506-508.
8. Deschaseaux ESM, Jones GB, Deseo MA, Shepherd KM, Kiene RP, Swan HB, et al. Effects of environmental factors on dimethylated sulfur compounds and their potential role in the antioxidant system of the coral holobionts. *Limnol. Oceanogr.* 2014;59:758-768
9. Raina JB, Dinsdale EA, Willis BL, Bourne DG. Do the organic sulfur compounds DMSP and DMS drive coral microbial associations? *Trends Microbiol.* 2010;18:101-108.
10. Reisch CR, Moran MA, Whitman WB. Bacterial catabolism of Dimethylsulfoniopropionate(DMSP). *Front Microbiol.* 2011;2:172.
11. Curson ARJ, Todd JB, Sullivan MJ, Johnston AWB. Catabolism of dimethylsulphonio propionate: microorganisms, enzymes and genes. *Nat Rev Microbiol.* 2011;9:849-859.
12. Raina JB, Tapiolas D, Willis D, Bourne DG. Coral-associated bacteria and their role in the biogeochemical cycling of sulfur. *Appl Environ Microbiol.* 2009;75:3492.
13. Todd JD, Rogers R, Li YG, Wexler M, Bnd PL, Sun L. Structural and regulatory genes required to make the gas dimethylsulfide in bacteria. *Science.* 2007;315:666-669.



14. Bourne DG, Iida Y, Uthicke S, Smith-Keune C. Changes in coral-associated microbial communities during a bleaching event. *ISME J.* 2008;2:350-363.
15. Ransome E, Rowley SJ, Thomas S, Tait K, Munn CB. Disturbance to conserved bacterial communities in the cold-water gorgonian coral *Eunicella verrucosa*. *FEMS Microbiol Ecol.* 2014;90:404-416.
16. Pike RE, Haltli D, Kerr RG. *Endozoicomonas euniceicola* sp. nov. and *Endozoicomonas gorgoniicola* sp. nov., bacterial isolated from the octocorals. *Eunicea fusca* and *Plexaura* sp. *Int J Syst Evol Microbiol.* 2013;63:4294-4302.
17. Shiu JH, Keshavmurthy S, Chian PW, Chen HJ, Lou SP, Tseng CH et al. Dynamics of coral-associated bacterial communities acclimated to temperature stress based on recent thermal history. *Sci Rep.* 2017;7:14933.
18. Ziegler M, Roik A, Porter A, Zubier K, Mudarris MS, Ormond R et al. Coral microbial community dynamics in response to anthropogenic impacts near a major city in the central Red Sea. *Mar Pollut Bull.* 2016;105:629-640.
19. Tandon K, Chiang PW, Chen WM, Tang SL. Draft Genome Sequence of *Endozoicomonas acroporae* Strain Acr-14<sup>T</sup>, Isolated from *Acropora* Coral. *Genome Announc.* 2018;6:e01576-17
20. Sheu SY, Lin KR, Hsu MY, Sheu DS, Tang SL, Chen WM. *Endozoicomonas acroporae* sp. nov., isolated from *Acropora* coral. *Int J Syst Microbiol.* 2017;67:3791-3797.
21. Neave MJ, Michell CT, Apprill A, Voolstra CR. *Endozoicomonas* genomes reveal functional adaptation and plasticity in bacterial strains symbiotically associated with diverse marine hosts. *Sci Rep.* 2017;7:40579.

22. Kwan JC, Donia MS, Han AW, Hirose E, Haygood MG, Schmidt EW, Eric W. Genome streamlining and chemical defense in a coral reef symbiosis. Proc Natl Acad Sci USA. 2012;109:20655-20660.
23. Shapiro JA. Transposable elements as the key to a 21<sup>st</sup> century view of evolution, Genetica, 1999b;107:171-179.

## Figure Legends

**Figure 1. A)** RT-qPCR expression analysis; relative *DddD* gene expression increased significantly with time (0, 16, 24, 48 hours) when cultures were grown with 1mM DMSP compared to no DMSP (t-test p value <0.05). **B)** Quantification of DMS released, DMS release was only observed in the 1mM DMSP+ active bacteria condition, not in conditions b or c.

**Figure 2.** Genomic divergence analysis using heat-maps from **A)** AAI, **B)** ANI, and **C)** DDH. Phylogenetic analysis **D)** Core-genome (308 genes)-based unrooted phylogenetic tree with *E. acroporae* strains forming a separate clade, as shown in zoomed image.

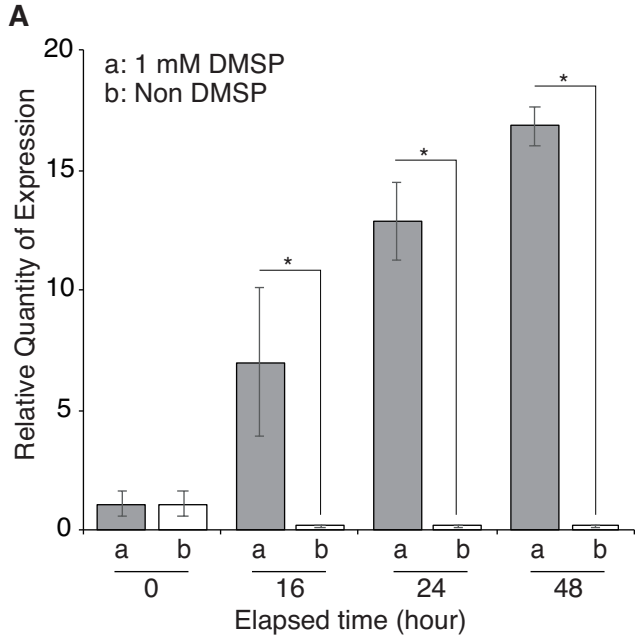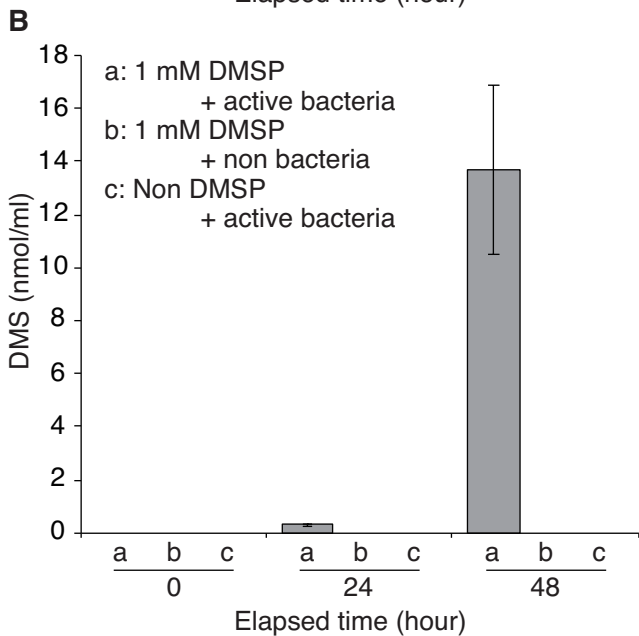

Fig. 2

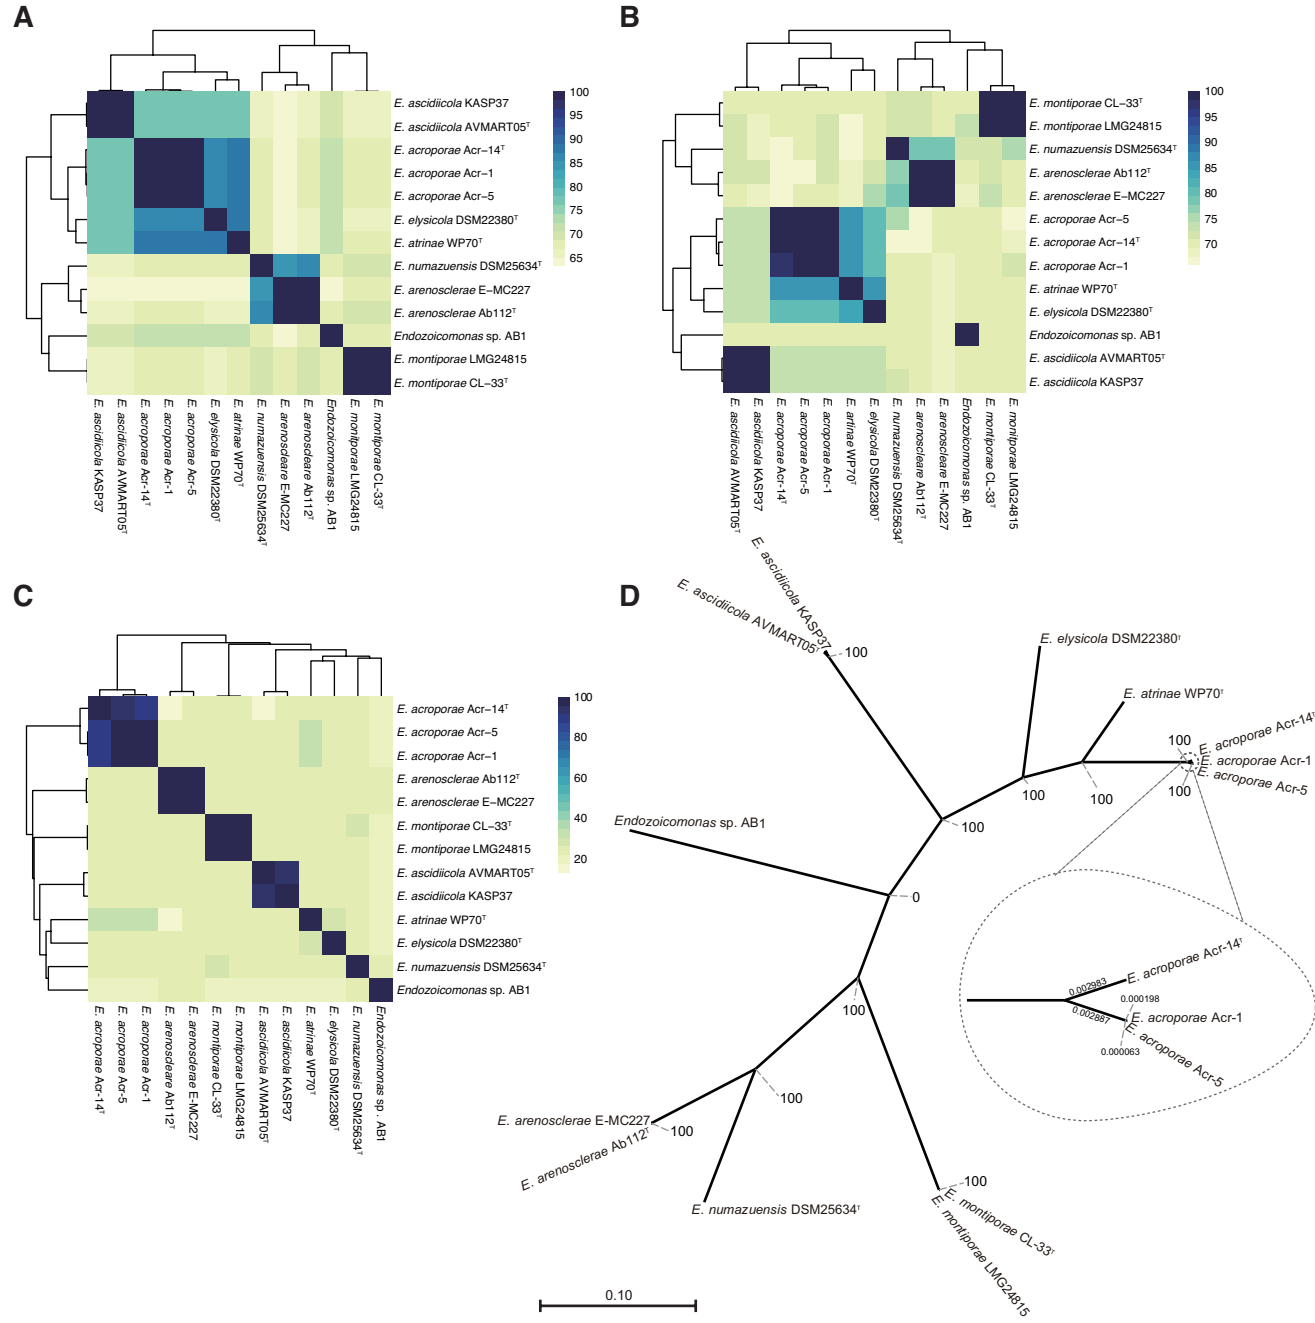

Source: http://biorxiv.org/content/10.1101/519546v4.full.pdf
