1 **Dominant coral bacterium *Endozoicomonas acroporae* metabolizes DMSP**

2 **Kshitij Tandon<sup>1,2,3</sup>, Pei-Wen Chiang<sup>1</sup>, Chih-Ying Lu<sup>1</sup>, Shan-Hua Yang<sup>4,5</sup>, Ya-Fan Chen<sup>1</sup>, Naohisa**

3 **Wada<sup>1</sup>, Ping-Yun Chen<sup>6</sup>, Hsiao-Yu Chang<sup>6</sup>, Ming-Shean Chou<sup>6</sup>, Wen-Ming Chen<sup>7</sup>, Sen-Lin Tang<sup>1,2</sup>**

4 **#**

5 <sup>1</sup>Biodiversity Research Center, Academia Sinica, Taipei 115, Taiwan

6 <sup>2</sup>Bioinformatics Program, Institute of Information Science, Taiwan International Graduate  
7 Program, Academia Sinica, Taipei 115, Taiwan

8 <sup>3</sup>Institute of Bioinformatics and Structural Biology, National Tsing Hua University, Hsinchu 300,  
9 Taiwan

10 <sup>4</sup>Department of Life Science, Tunghai University, Taichung 40704, Taiwan

11 <sup>5</sup>Center for Ecology and Environment, Tunghai University, Taichung 40704, Taiwan

12 <sup>6</sup>Institute of Environmental Engineering, National Sun Yat-Sen University, Kaohsiung 80424 Taiwan,  
13 ROC

14 <sup>7</sup>Laboratory of Microbiology, Department of Seafood Science, National Kaohsiung Marine  
15 University, No. 142, Hai-Chuan Rd, Nan-Tzu, Kaohsiung City 811, Taiwan, ROC.

16 **# Corresponding author**

17 Corresponding author Email: [sltang@gate.sinica.edu.tw](mailto:sltang@gate.sinica.edu.tw)

18

19

20

21 **Abstract**

22 Dominant coral-associated *Endozoicomonas* bacteria species are hypothesized to play a role in  
23 the global sulfur cycle by metabolizing Dimethylsulfoniopropionate (DMSP) into Dimethylsulfide  
24 (DMS), which releases sulfur into the atmosphere; however, no sequenced genome to date  
25 harbors genes for this process. We assembled high-quality (>95% complete) genomes of two  
26 new strains (Acr-1 and Acr-5) of a recently added species *Endozoicomonas acroporae* isolated  
27 from the coral *Acropora muricata*. We identified and functionally characterized the first DMSP  
28 lyase—a *dddD* gene homolog found in all *E. acroporae*, capable of metabolizing DMSP into DMS  
29 via the DddD cleavage pathway—using RT-qPCR and GC. Comparative genomic analysis  
30 identified that *Endozoicomonas* has high genomic divergence and a high proportion of oxidative  
31 stress responsive genes and that *E. acroporae* strains have the highest number of Type III  
32 secretion system genes (T3SS) in the genus. This study confirms the role of *Endozoicomonas* in  
33 the global sulfur cycle.

34

35

36

37

38

39

## 40 Introduction

41 The genus *Acropora* contains some of the most abundant reef-building corals in the Indo-Pacific  
42 [1], and these corals are also some of the most significant producers of  
43 dimethylsulphonioacetate (DMSP) [2,3]. DMSP is present in coral tissue, mucus and  
44 symbiotic algae [4]. It is the central molecule in the marine sulfur cycle and precursor to  
45 dimethylsulphide (DMS), a climate-active gas [5,6]. DMSP is hypothesized to be part of the coral  
46 holobiont antioxidant system [7] and it act as an osmoprotectant against salinity fluctuations  
47 [3]. DMSP also acts as a signal molecule that attracts specific bacterial groups, which can form  
48 coral holobionts and underpin coral health [8].

49 Coral-associated bacteria use DMSP produced by corals and their symbiotic algae as a  
50 reduced sulfur and carbon source [8, 9]; they can also metabolize it into DMS [5,6]. DMSP  
51 degradation by marine organisms takes place via two pathways, the cleavage pathway and the  
52 demethylation pathway [9, 10]. Raina et al. [11] recently reported that the majority of DMSP-  
53 degrading bacteria belong to class *Gammaproteobacteria*, which includes *Alteromonas*-,  
54 *Arhodomonas*-, *Idiomarina*-, *Pseudomonas*- and *Spongiobacter*-related organisms. Of these,  
55 *Arhodomonas*-, *Pseudomonas*-, and *Roseobacter*-related species harbor a DMSP lyase—i.e. the  
56 *dddD* gene, first identified in *Marinomonas* sp. for degrading DMSP [12]. *Endozoicomonas*  
57 species, which are predominantly associated with keeping their coral host healthy [13], have  
58 been hypothesized to play role in the global sulfur cycle by effectively metabolizing DMSP into  
59 DMS [14,15]. However, no previous study has confirmed the genus' role.

60

## 61 **Material and Methods**

62 We *de-novo* assembled high quality (>95% complete) genomes of two new strains (Acr-1  
63 and Acr-5) of a recently added species *Endozoicomonas acroporae* isolated from the coral  
64 *Acropora muricata* and identified for the first time a *dddD* gene homolog capable of metabolizing  
65 DMSP into DMS via the *DddD* cleavage pathway in all the *E. acroporae* strains. Furthermore, we  
66 functionally characterized the expression of the *DddD* gene and quantified the amount of DMS  
67 released using RT-qPCR and Gas chromatography(GC). Comparative genomic analysis of genus  
68 *Endozoicomonas* was performed to ascertain its genomic characteristics and features. We also  
69 profiled the abundance of *E. acroporae* species in Penghu, Taiwan and the Red Sea, Saudi Arabia  
70 (for details see supplementary data).

## 71 **Results and Discussion**

72 We assembled high quality genomes (>95% complete) of the two *E. acroporae* strains and  
73 also used the previously assembled type strain *E. acroporae* Acr-14<sup>T</sup> [16,17] (Table S1, Fig S1). *E.*  
74 *acroporae* species are dominant coral-associated bacteria in the Red Sea, Saudi Arabia (Fig S2A,  
75 B) and Penghu, Taiwan (Fig S2C, D). All three strains of *E. acroporae* have a *dddD* gene homolog  
76 that encodes a DMSP lyase. RT-qPCR analysis of the *dddD* gene from *E. acroporae* Acr-14<sup>T</sup> cultured  
77 in 1mM DMSP resulted in 42.77, 56.52, and 91.37 times higher expression than samples cultured  
78 without DMSP after 16, 24 and 48hrs, respectively (Fig 1A). The amount of DMS released when  
79 the culture (*E. acroporae* Acr-14<sup>T</sup>) was incubated in a DMSP-rich environment was significantly  
80 higher (*t-test*, *p-value* <0.05) than controls (Fig 1B). The temporal increase in the concentration  
81 of released DMS confirms that *E. acroporae* can metabolize DMSP into DMS. The discovery of the

82 *dddD* gene in *Endozoicomonas* provides new insights into the evolution of the DMSP cleavage  
83 pathway and further confirms the hypothesis that *Endozoicomonas* plays a role in the global sulfur  
84 cycle.

85 Comparative genomic analysis identified high genomic divergence using Amino-Acid  
86 Identity (AAI), Average Nucleotide Identity (ANI) and DNA-DNA Hybridization (DDH) (Fig 2 A, B,  
87 and C) in the genus and also a reduced core genome (308 genes) (Fig S3). Genomes of  
88 *Endozoicomonas* species are large (5.43 ~ 6.69 Mb) (Table S2) and encode genes for all essential  
89 amino-acids [18], giving clues about not predominant genome streamlining as identified in  
90 symbiotic bacteria [19] and other symbiotic life stages [20]. Moreover, *E. acroporae* species have  
91 the highest numbers of T3SS genes in *Endozoicomonas* (Table S3), suggesting an intricate  
92 relationship with their host. Moreover, *E. acroporae* strains have different IS elements than *E.*  
93 *montiporae*, hinting that the two coral isolates have different evolution histories (Fig S4).  
94 Moreover, diverse phage insertions in *Endozoicomonas* species genomes suggest different  
95 infection histories (Table S4). In addition, *E. montiporae* and *E. acroporae* do not share any  
96 branches, according to core-genome based phylogenetic analysis; instead, their strains cluster  
97 tightly within their clades (Fig 2D). These results indicate that host and *Endozoicomonas* species  
98 have a complex nature of co-diversification. All species in this genus have a high percentage of  
99 oxidative stress responsive genes, which might be attributed to resistance against low oxygen  
100 environment in the ocean as well as highlight the genus *Endozoicomonas*' adaptation to marine  
101 environments (Fig S5).

## 103 **Conclusion**

104           This study identified and functionally characterized DMSP lyase—a *dddD* gene homolog—  
105 in *E. acroporae* and, in doing so, confirms the role of this coral dominant bacterium in the global  
106 sulfur cycle. We also report two high quality genomes for new strains of *E. acroporae* and  
107 performed an up-to-date comparative genomic analysis on this genus. We identified a high  
108 genomic divergence and high percentage of oxidative stress response genes in all the species of  
109 this genus. We compared two coral host-specific *Endozoicomonas* and report a diverse array of IS  
110 elements in the genomes, giving clues about genome plasticity.

## 111 **Data Availability**

112 *E. acroporae* Acr-1 and Acr-5 assembled draft genomes are submitted to GenBank under  
113 accession numbers SAUT000000000 and SAUU000000000, respectively.

## 114 **Acknowledgements**

115 This study was supported by funding from Academia Sinica. KT would like to acknowledge the  
116 Taiwan International Graduate Program (TIGP) for its fellowship towards his graduate studies.  
117 Authors would like to acknowledge support from Dr. Shu-Fen Chiou for conduction GC  
118 experiment.

## 119 **Author Contributions**

120 K.T and S.L.T conceived the idea of this study. K.T assembled the genomes, performed  
121 bioinformatics analysis and wrote the manuscript. P.W.C cultured the strains and performed RT-  
122 qPCR analysis. C.Y.L and Y.F.C performed GC experiments and analysis. S.H.Y and N.H.W helped

123 write the manuscript. P.Y.C, H.Y.C, and M.S.C helped in GC experiments and provided the  
124 instruments for conducting the experiment. W.M.C provided the cultures. S.L.T supervised the  
125 overall study and modified the manuscript.

## 126 **References**

- 127 1. Veron, JEN. *Coral of the World* Vol. 1-3 (Australian Institute of Marine Science, 2000).
- 128 2. Broadent AD, Jones GB, and Jones RJ. DMSP in Corals and Benthic Algae from the Great  
129 Barrier Reef. *Estuar. Coast. Shelf Sci.* 2002 **55**: 547-555.
- 130 3. Raina JB, Tapiolas DM, Foret S, Lutz A, Abrego D, Ceh J *et al.* DMSP biosynthesis by an  
131 animal and its role in coral thermal stress response. *Nature* 2013. **502**: 677-680.
- 132 4. Broadent AD and Jones GB. DMS and DMSP in mucus ropes, coral mucus, surface films  
133 and sediment pore waters from coral reefs in the Great Barrier Reef. *Mar Freshwater Res*  
134 2004 **55**: 849-855.
- 135 5. Ayers GP and Gras, JL. Seasonal relationship between cloud condensation nuclei and  
136 aerosol methanesulphonate in marine air. *Nature* 1991 **353**: 834-835.
- 137 6. Vallina SM and Simo R. Strong relationship between DMSP and the solar radiation dose  
138 over the global surface ocean. *Science* 2007 **315**: 506-508.
- 139 7. Deschaseaux ESM, Jones GB, Deseo MA, Shepher KM, Kiene RP, Swan HB, et al. Effects of  
140 environmental factors on dimethylated sulfur compounds and their potential role in the  
141 antioxidant system of the coral holobionts. *Limnol. Oceanogr.* 2014 **59(3)**:758-768
- 142 8. Raina JB, Dinsdale EA, Willis BL, Bourne DG. Do the organic sulfur compounds DMSP and  
143 DMS drive coral microbial associations? *Trends Microbiol.* 2010 **18**: 101-108.

- 144 9. Reisch CR, Moran MA, Whitman WB. Bacterial catabolism of  
145 Dimethylsulfoniopropionate(DMSP). *Front. Microbiol.* 2011 **2**:172.
- 146 10. Curson ARJ, Todd JB, Sullivan MJ, Johnston AWB. Catabolism of  
147 dimethylsulphonioipropionate: microorganisms, enzymes and genes. *Nat Rev Microbiol.*  
148 2011 **9**:849-859.
- 149 11. Raina JB, Tapiolas D, Willis D, Bourne DG. Coral-associated bacteria and their role in the  
150 biogeochemical cycling of sulfur. *Appl. Environ. Microbiol.* 2009 **75**:3492.
- 151 12. Todd JD, Rogers R, Li YG, Wexler M, Bnd PL, Sun L. Structural and regulatory genes required  
152 to make the gas dimethylsulfide in bacteria. *Science* 2007 **315**: 666-669.
- 153 13. Bourne DG, Iida Y, Uthicke S, Smith-Keune C. Changes in coral-associated microbial  
154 communities during a bleaching event. *ISME J.* 2008 **2**:350-363.
- 155 14. Ransome E, Rowley SJ, Thomas S, Tait K, Munn CB. Disturbance to conserved bacterial  
156 communities in the cold-water gorgonian coral *Eunicella verrucosa*. *FEMS Microbiol. Ecol.*  
157 2014 **90**: 404-416.
- 158 15. Pike RE, Haltli D, Kerr RG. *Endozoicomonas euniceicola* sp. nov. and *Endozoicomonas*  
159 *gorgoniicola* sp. nov., bacterial isolated from the octocorals. *Eunicea fusca* and *Plexaura*  
160 *sp.* *Int. J. Syst. Evol. Microbiol.* 2013 **63**: 4294-4302.
- 161 16. Tandon K, Chiang PW, Chen WM, Tang SL. Draft Genome Sequence of *Endozoicomonas*  
162 *acroporae* Strain Acr-14<sup>T</sup>, Isolated from *Acropora* Coral. *Genome Announc.* 2018 **6(6)**:  
163 e01576-17
- 164 17. Sheu SY, Lin KR, Hsu MY, Sheu DS, Tang SL, Chen WM. *Endozoicomonas acroporae* sp. nov.,  
165 isolated from *Acropora* coral. *Int. J. Syst. Microbiol.* 2017 **67**: 3791-3797.



- 166 18. Neave MJ, Michell CT, Apprill A, Voolstra CR. *Endozoicomonas* genomes reveal functional  
167 adaptation and plasticity in bacterial strains symbiotically associated with diverse marine  
168 hosts. *Sci. Rep.* 2017 **7**:40579.
- 169 19. Kwan JC, Donia MS, Han AW, Hirose E, Haygood MG, Schmidt EW, Eric W. Genome  
170 streamlining and chemical defense in a coral reef symbiosis. *Proc. Natl. Acad. Sci. USA*  
171 2012 **109**: 20655-20660.

172

### 173 **Figure Legends**

174 **Figure 1. A)** RT-qPCR expression analysis; relative *DddD* gene expression increased significantly  
175 with time (0, 16, 24, 48 hours) when cultures were grown with 1mM DMSP compared to no DMSP  
176 (*t*-test *p* value <0.05). **B)** Quantification of DMS released, DMS release was only observed in the  
177 1mM DMSP+ active bacteria condition, not in conditions b or c.

178 **Figure 2.** Genomic divergence analysis using heat-maps from **A)** AAI, **B)** ANI, and **C)** DDH.  
179 Phylogenetic analysis **D)** Core-genome (308 genes)-based unrooted phylogenetic tree with *E.*  
180 *acroporae* strains forming a separate clade, as shown in zoomed image.

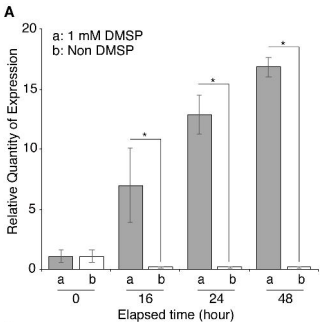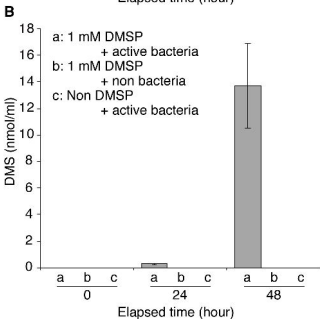

Source: https://www.biorxiv.org/content/10.1101/519546v2.full.pdf
